# Supplementary material for: Functional perfusion image guided radiation treatment planning for locally advanced lung cancer
Source: PubMed Central journal article supplement — Phys Imaging Radiat Oncol. 2019 Sep 20;11:76–81. doi: 10.1016/j.phro.2019.08.007 (PMC7807615; doi:10.1016/j.phro.2019.08.007), 2019-09-20
Supplement: mmc1.pdf [file mmc1.pdf]

**Supplementary Figure S1.** Perfusion SPECT/CT. Functional lung (FL) segmented contours in colour, FL 20% of maximum perfusion intensity within total lung minus gross tumour volume in blue, FL 40%- green, FL 60%- yellow, FL 80%- red.

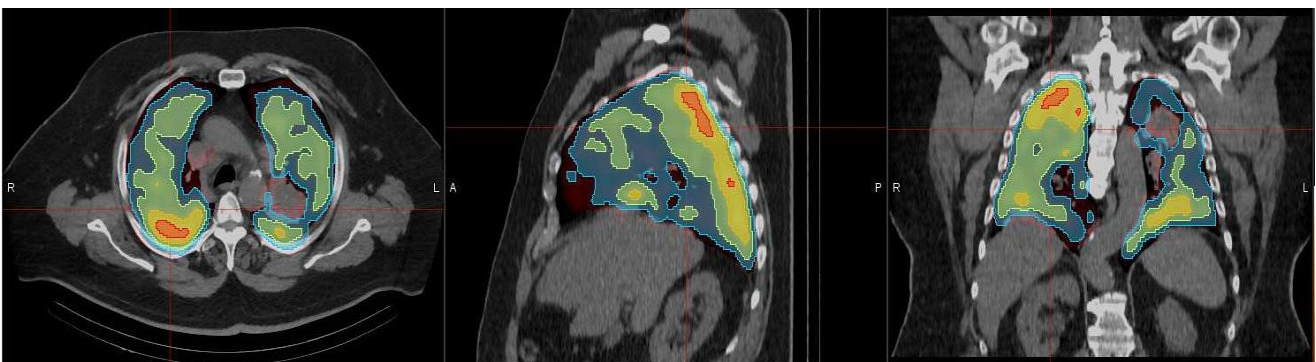

## Supplementary Table S1

### A. Dosimetric results for IMRT functional avoidance (FA) and standard reference (SR) plans

| Parameter/ structure        | Plan: | SR            | FA            | Mean difference | 95% CI      | t -test         |
|-----------------------------|-------|---------------|---------------|-----------------|-------------|-----------------|
|                             |       | Mean ± SD     | Mean ± SD     | (±SE)           |             | p value         |
| Mean lung* dose, Gy         |       | 14.49 ± 3.71  | 14.13 ± 3.69  | 0.36 ± 0.21     | -0.09; 0.81 | 0.11            |
| Lung V5, %                  |       | 56.29 ± 16.50 | 57.18 ± 14.71 | -0.89 ± 2.02    | -5.23; 3.45 | 0.67            |
| Lung V20, %                 |       | 27.59 ± 7.21  | 25.57 ± 6.82  | 2.02 ± 0.57     | 0.81; 3.24  | <b>0.01</b>     |
| Lung V30, %                 |       | 17.12 ± 6.27  | 16.10 ± 6.09  | 1.03 ± 0.35     | 0.27; 1.78  | <b>0.01</b>     |
| Functional lung:            |       |               |               |                 |             |                 |
| FL20%: Mean dose, Gy        |       | 14.19 ± 4.24  | 13.44 ± 4.03  | 0.75 ± 0.24     | 0.25; 1.26  | <b>0.01</b>     |
| V5, %                       |       | 56.91 ± 1.29  | 57.33 ± 15.31 | -0.41 ± 1.94    | -4.58; 3.76 | 0.84            |
| V20, %                      |       | 25.41 ± 8.87  | 22.72 ± 7.84  | 2.69 ± 0.59     | 1.43; 3.95  | <b>&lt;0.01</b> |
| V30, %                      |       | 16.27 ± 7.51  | 14.91 ± 7.16  | 1.35 ± 0.39     | 0.51; 2.19  | <b>0.01</b>     |
| FL40%: Mean dose, Gy        |       | 13.34 ± 5.38  | 11.61 ± 4.49  | 1.73 ± 0.40     | 0.87; 2.58  | <b>&lt;0.01</b> |
| V5, %                       |       | 56.98 ± 21.37 | 55.25 ± 19.09 | 1.74 ± 1.70     | -1.90; 5.37 | 0.32            |
| V20, %                      |       | 22.15 ± 11.97 | 16.91 ± 8.67  | 5.24 ± 1.39     | 2.26; 8.22  | <b>&lt;0.01</b> |
| V30, %                      |       | 14.48 ± 9.94  | 11.45 ± 7.38  | 3.03 ± 1.17     | 0.51; 5.54  | <b>0.02</b>     |
| FL60%: Mean dose, Gy        |       | 10.96 ± 5.20  | 8.82 ± 4.55   | 2.15 ± 0.52     | 1.04; 3.25  | <b>&lt;0.01</b> |
| V5, %                       |       | 57.91 ± 23.37 | 51.40 ± 22.81 | 6.50 ± 2.68     | 0.77; 12.24 | <b>0.03</b>     |
| V20, %                      |       | 14.51 ± 12.69 | 9.56 ± 10.37  | 4.95 ± 1.68     | 1.36; 8.53  | <b>0.01</b>     |
| V30, %                      |       | 8.39 ± 11.93  | 5.84 ± 7.24   | 2.55 ± 1.57     | -0.82; 5.91 | 0.13            |
| FL80%: Mean dose, Gy        |       | 9.0 ± 5.73    | 6.70 ± 4.68   | 2.30 ± 0.54     | 1.14; 3.45  | <b>&lt;0.01</b> |
| V5, %                       |       | 60.19 ± 34.62 | 50.68 ± 37.86 | 9.50 ± 4.17     | 0.56; 18.45 | <b>0.04</b>     |
| V20, %                      |       | 7.49 ± 12.90  | 4.13 ± 9.10   | 3.36 ± 1.44     | 0.28; 6.44  | <b>0.04</b>     |
| V30, %                      |       | 2.93 ± 10.10  | 1.07 ± 3.44   | 1.86 ± 1.72     | -1.83; 5.56 | 0.29            |
| Max dose to spinal cord, Gy |       | 40.71 ± 10.33 | 40.55 ± 13.64 | 0.16 ± 1.86     | -3.86; 4.18 | 0.93            |
| Mean heart dose, Gy         |       | 11.52 ± 7.89  | 11.52 ± 7.65  | -0.01 ± 0.47    | -1.02; 1.00 | 0.98            |
| Heart V30, %                |       | 14.51 ± 13.77 | 14.23 ± 11.75 | 0.28 ± 1.19     | -2.27; 2.82 | 0.82            |

|                          |              |              |              |             |             |
|--------------------------|--------------|--------------|--------------|-------------|-------------|
| Heart V60, %             | 0.7 ± 1.15   | 0.7 ± 1.16   | 0.01 ± 0.1   | -0.21; 0.22 | 0.95        |
| Mean oesophagus dose, Gy | 19.53 ± 7.03 | 19.68 ± 6.90 | -0.16 ± 0.39 | -0.99; 0.68 | 0.69        |
| Oesophagus V60           | 4.88 ± 5.28  | 3.38 ± 3.40  | 1.5 ± 0.57   | 0.29; 2.72  | <b>0.02</b> |
| PTV coverage**, %        | 98.59 ± 1.59 | 98.49 ± 1.67 | 0.11 ± 0.19  | -0.31; 0.53 | 0.58        |

### B. Dosimetric results for VMAT functional avoidance (FA) and standard reference (SR) plans

| Parameter/ structure | Plan: | SR            | FA            | Mean difference | 95% CI       | t-test      |
|----------------------|-------|---------------|---------------|-----------------|--------------|-------------|
|                      |       | Mean ± SD     | Mean ± SD     | (±SE)           |              | p value     |
| Mean lung* dose, Gy  |       | 13.99 ± 3.50  | 13.95 ± 3.67  | 0.04 ± 0.31     | -0.64; 0.71  | 0.91        |
| Lung V5, %           |       | 58.20 ± 16.07 | 57.27 ± 14.81 | 0.93 ± 1.01     | -1.23; 3.09  | 0.37        |
| Lung V20, %          |       | 25.04 ± 6.48  | 25.31 ± 7.54  | -0.27 ± 0.95    | -2.31; 1.77  | 0.78        |
| Lung V30, %          |       | 15.11 ± 5.29  | 15.79 ± 5.84  | -0.69 ± 0.43    | -1.61; 0.23  | 0.13        |
| Functional lung:     |       |               |               |                 |              |             |
| FL20%: Mean dose, Gy |       | 13.86 ± 4.11  | 13.43 ± 3.98  | 0.43 ± 0.29     | -0.19; 1.04  | 0.16        |
| V5, %                |       | 59.05 ± 17.43 | 58.20 ± 15.49 | 0.85 ± 1.23     | -1.80; 3.50  | 0.5         |
| V20, %               |       | 24.16 ± 8.47  | 22.26 ± 7.89  | 1.89 ± 0.83     | 0.11; 3.67   | <b>0.04</b> |
| V30, %               |       | 14.90 ± 6.69  | 14.66 ± 6.64  | 0.24 ± 0.39     | -0.59; 1.07  | 0.55        |
| FL40%: Mean dose, Gy |       | 12.87 ± 5.30  | 11.68 ± 4.60  | 1.18 ± 0.37     | 0.38; 1.98   | <b>0.01</b> |
| V5, %                |       | 58.91 ± 22.70 | 56.86 ± 20.52 | 2.05 ± 1.49     | -1.14; 5.24  | 0.19        |
| V20, %               |       | 21.24 ± 11.69 | 16.72 ± 8.72  | 4.52 ± 1.41     | 1.49; 7.55   | <b>0.01</b> |
| V30, %               |       | 12.97 ± 8.63  | 11.30 ± 6.93  | 1.67 ± 0.91     | -0.29; 3.63  | 0.09        |
| FL60%: Mean dose, Gy |       | 10.53 ± 5.43  | 8.96 ± 4.82   | 1.57 ± 0.46     | 0.58; 2.55   | <b>0.01</b> |
| V5, %                |       | 57.10 ± 23.64 | 53.94 ± 23.74 | 3.15 ± 3.10     | -3.49; 9.80  | 0.33        |
| V20, %               |       | 15.08 ± 14.25 | 9.51 ± 10.64  | 5.57 ± 1.60     | 2.14; 9.00   | <b>0.01</b> |
| V30, %               |       | 7.69 ± 10.28  | 5.84 ± 7.24   | 1.85 ± 0.98     | -0.25; 3.96  | 0.08        |
| FL80%: Mean dose, Gy |       | 9.17 ± 7.02   | 7.44 ± 5.63   | 1.73 ± 0.60     | 0.45; 3.01   | <b>0.01</b> |
| V5, %                |       | 58.47 ± 35.25 | 55.55 ± 36.61 | 2.92 ± 2.26     | -1.93; 7.78  | 0.22        |
| V20, %               |       | 11.26 ± 21.21 | 6.61 ± 17.70  | 4.64 ± 2.69     | -1.12; 10.41 | 0.11        |
| V30, %               |       | 5.31 ± 13.76  | 1.69 ± 4.25   | 3.62 ± 2.49     | -1.71; 8.96  | 0.17        |

|                             |               |               |              |             |             |
|-----------------------------|---------------|---------------|--------------|-------------|-------------|
| Max dose to spinal cord, Gy |               |               |              |             |             |
| Mean heart dose, Gy         | 10.67 ± 6.94  | 10.86 ± 7.19  | -0.19 ± 0.32 | -0.88; 0.49 | 0.55        |
| Heart V30, %                | 11.15 ± 10.64 | 11.51 ± 10.21 | -0.37 ± 1.39 | -3.35; 2.6  | 0.8         |
| Heart V60, %                | 1.16 ± 1.71   | 1.41 ± 2.26   | -0.25 ± 0.17 | -0.62; 0.12 | 0.16        |
| Mean oesophagus dose, Gy    | 19.85 ± 7.43  | 20.10 ± 7.79  | -0.26 ± 0.33 | -0.96; 0.45 | 0.45        |
| Oesophagus V60              | 6.80 ± 5.80   | 8.09 ± 7.16   | -1.29 ± 0.48 | -2.3; -0.27 | <b>0.02</b> |
| PTV coverage**, %           | 98.08 ± 1.71  | 98.47 ± 1.11  | -0.39 ± 0.01 | -1.03; 0.26 | 0.22        |

### C. Dosimetric results for 3D conformal functional avoidance (FA) and standard reference (SR) plans

| Parameter/ structure | Plan: | SR            | FA            | Mean difference | t -test     |
|----------------------|-------|---------------|---------------|-----------------|-------------|
|                      |       | Mean ± SD     | Mean ± SD     | (±SE)           | p value     |
|                      |       |               |               | 95% CI          |             |
| Mean lung* dose, Gy  |       | 16.25 ± 4.35  | 16.52 ± 4.56  | -0.27 ± 0.40    | 0.51        |
| Lung V5, %           |       | 57.83 ± 13.67 | 59.09 ± 15.62 | -1.26 ± 2.05    | 0.55        |
| Lung V20, %          |       | 31.31 ± 9.60  | 31.19 ± 10.34 | 0.13 ± 1.25     | 0.92        |
| Lung V30, %          |       | 21.54 ± 7.55  | 21.14 ± 7.64  | 0.40 ± 0.68     | 0.56        |
| Functional lung:     |       |               |               |                 |             |
| FL20%: Mean dose, Gy |       | 15.88 ± 4.97  | 16.14 ± 5.02  | -0.26 ± 0.38    | 0.5         |
| V5, %                |       | 58.78 ± 14.90 | 60.65 ± 17.56 | -1.86 ± 2.22    | 0.42        |
| V20, %               |       | 28.78 ± 10.56 | 28.63 ± 10.97 | 0.14 ± 1.09     | 0.9         |
| V30, %               |       | 20.64 ± 8.95  | 19.54 ± 7.63  | 1.09 ± 0.96     | 0.27        |
| FL40%: Mean dose, Gy |       | 14.46 ± 6.32  | 14.1 ± 5.95   | 0.37 ± 0.51     | 0.49        |
| V5, %                |       | 57.08 ± 19.36 | 58.86 ± 22.01 | -1.78 ± 3.31    | 0.6         |
| V20, %               |       | 24.75 ± 13.46 | 22.02 ± 11.87 | 2.73 ± 1.02     | <b>0.02</b> |
| V30, %               |       | 18.32 ± 12.37 | 15.07 ± 9.27  | 3.25 ± 1.67     | 0.07        |
| FL60%: Mean dose, Gy |       | 10.97 ± 6.05  | 10.84 ± 5.3   | 0.13 ± 0.58     | 0.83        |
| V5, %                |       | 56.44 ± 21.50 | 58.71 ± 23.57 | -2.27 ± 4.81    | 0.64        |
| V20, %               |       | 14.56 ± 13.21 | 12.35 ± 12.13 | 2.21 ± 1.7      | 0.22        |
| V30, %               |       | 9.59 ± 12.48  | 7.41 ± 7.92   | 2.17 ± 1.72     | 0.23        |
| FL80%: Mean dose, Gy |       | 9.33 ± 6.39   | 8.82 ± 5.46   | 0.52 ± 0.72     | 0.48        |
| V5, %                |       | 60.61 ± 31.99 | 60.92 ± 33.93 | -0.31 ± 5.57    | 0.96        |

|                             |               |               |               |             |      |
|-----------------------------|---------------|---------------|---------------|-------------|------|
| V20, %                      | 9.68 ± 18.23  | 6.89 ± 12.52  | 2.78 ± 2.75   | -3.11; 8.67 | 0.33 |
| V30, %                      | 4.46 ± 11.22  | 1.94 ± 4.27   | 2.53 ± 2.19   | -2.21; 7.28 | 0.27 |
| Max dose to spinal cord, Gy | 43.83 ± 14.22 | 43.59 ± 14.88 | 0.23 ± 1.39   | -2.75; 3.22 | 0.87 |
| Mean heart dose, Gy         | 13.2 ± 9.40   | 12.94 ± 8.78  | 0.27 ± 0.58   | -0.98; 1.51 | 0.65 |
| Heart V30, %                | 18.54 ± 17.08 | 18.15 ± 16.82 | 0.38 ± 0.92   | -1.58; 2.35 | 0.68 |
| Heart V60, %                | 2.35 ± 2.83   | 2.24 ± 3.01   | 0.11 ± 0.24   | -0.41; 0.63 | 0.67 |
| Mean oesophagus dose, Gy    | 22.35 ± 8.18  | 23.02 ± 8.40  | -0.67 ± 0.57  | -1.90; 0.56 | 0.27 |
| Oesophagus V60              | 10.38 ± 11.93 | 10.08 ± 10.57 | 0.30 ± 1.98   | -3.95; 4.54 | 0.88 |
| PTV coverage**, %           | 97.22 ± 2.98  | 97.24 ± 1.99  | -0.025 ± 0.15 | -0.35; 0.30 | 0.87 |

FL 20-80%= functional lung >20-80% of maximum perfusion

GTV=gross tumour volume

PTV= planning tumour volume

MLD= mean lung dose

Vx, %=volume receiving x Gy radiation

\* both lungs from CT minus GTV

\*\* Percent of PTV volume covered by the 95% isodose
